# Supplementary material for: ﻿On the verge of extinction – revision of a highly endangered Swiss alpine snail with description of a new genus, Raeticella gen. nov. (Gastropoda, Eupulmonata, Hygromiidae)
Source: Zookeys. 2022 Jun 8;1104:69–91. doi: 10.3897/zookeys.1104.82866 (PMC9848827; doi:10.3897/zookeys.1104.82866)
Supplement: Supplementary material 1 — Calculated p-distances of the COI of the investigated specimens. [file zookeys-1104-069_article-82866__-s001.xls]

## Sheet: MatrixOutput
	NMBE_568100	Ichnusotricha_berninii_SMNS_ZI0105005-2520	Ichnusotricha_berninii_ZMH_96082-1776	NMBE_567164	NMBE_567165	NMBE_567167	NMBE_567168	NMBE_567149	NMBE_567150	NMBE_567152	NMBE_567153	NMBE_567155	NMBE_567156	NMBE_567159	NMBE_567161	NMBE_567137	NMBE_567139	NMBE_567140	NMBE_567142	NMBE_567143	NMBE_567145	NMBE_567146	NMBE_567148	NMBE_567162	NMBE_568103	MNHW_S.15.21_02	MNHW_S.15.27_12	MNHW_S.15.29_02	MNHW_S.15.29_101	MNHW_S-Er_50	MNHW_S-Er_51	NMBE_543063	NMBE_564601	NMBE_564607	NMBE_564609	NMBE_565821	NMBE_568094	Noricella_oreinos_M6_782_7237	Noricella_oreinos_M7_55_707	Noricella_oreinos_M8_781_7227	Noricella_oreinos_M9_779_7222	Noricella_oreinos_M11_134_999	Noricella_oreinos_M14_79_757	Noricella_scheerpeltzi_M1_12_767	Noricella_scheerpeltzi_M3_765_7172	Noricella_scheerpeltzi_M4_367_3396	Noricella_scheerpeltzi_M5_443_4108	Petasina_unidentata_811	Petasina_unidentata_1821
NMBE_568100
Ichnusotricha_berninii_SMNS_ZI0105005-2520	0.149618
Ichnusotricha_berninii_ZMH_96082-1776	0.158779	0.0427481
NMBE_567164	0.158779	0.143511	0.143511
NMBE_567165	0.160305	0.145038	0.145038	0.00152672
NMBE_567167	0.160305	0.145038	0.145038	0.00152672	0
NMBE_567168	0.160305	0.145038	0.145038	0.00152672	0	0
NMBE_567149	0.158779	0.141985	0.145038	0.00610687	0.00458015	0.00458015	0.00458015
NMBE_567150	0.158779	0.141985	0.145038	0.00610687	0.00458015	0.00458015	0.00458015	0
NMBE_567152	0.158779	0.141985	0.145038	0.00610687	0.00458015	0.00458015	0.00458015	0	0
NMBE_567153	0.158779	0.141985	0.145038	0.00610687	0.00458015	0.00458015	0.00458015	0	0	0
NMBE_567155	0.160305	0.143511	0.146565	0.00458015	0.00305344	0.00305344	0.00305344	0.00152672	0.00152672	0.00152672	0.00152672
NMBE_567156	0.160305	0.143511	0.146565	0.00458015	0.00305344	0.00305344	0.00305344	0.00152672	0.00152672	0.00152672	0.00152672	0
NMBE_567159	0.160305	0.143511	0.146565	0.00458015	0.00305344	0.00305344	0.00305344	0.00152672	0.00152672	0.00152672	0.00152672	0	0
NMBE_567161	0.160305	0.145038	0.145038	0.00152672	0	0	0	0.00458015	0.00458015	0.00458015	0.00458015	0.00305344	0.00305344	0.00305344
NMBE_567137	0.160305	0.145038	0.145038	0.00152672	0	0	0	0.00458015	0.00458015	0.00458015	0.00458015	0.00305344	0.00305344	0.00305344	0
NMBE_567139	0.158779	0.141985	0.145038	0.00610687	0.00458015	0.00458015	0.00458015	0.00305344	0.00305344	0.00305344	0.00305344	0.00152672	0.00152672	0.00152672	0.00458015	0.00458015
NMBE_567140	0.158779	0.141985	0.145038	0.00610687	0.00458015	0.00458015	0.00458015	0.00305344	0.00305344	0.00305344	0.00305344	0.00152672	0.00152672	0.00152672	0.00458015	0.00458015	0
NMBE_567142	0.160305	0.145038	0.145038	0.00152672	0	0	0	0.00458015	0.00458015	0.00458015	0.00458015	0.00305344	0.00305344	0.00305344	0	0	0.00458015	0.00458015
NMBE_567143	0.160305	0.145038	0.145038	0.00152672	0	0	0	0.00458015	0.00458015	0.00458015	0.00458015	0.00305344	0.00305344	0.00305344	0	0	0.00458015	0.00458015	0
NMBE_567145	0.160305	0.141985	0.145038	0.00610687	0.00458015	0.00458015	0.00458015	0.00305344	0.00305344	0.00305344	0.00305344	0.00152672	0.00152672	0.00152672	0.00458015	0.00458015	0.00305344	0.00305344	0.00458015	0.00458015
NMBE_567146	0.160305	0.141985	0.145038	0.00610687	0.00458015	0.00458015	0.00458015	0.00305344	0.00305344	0.00305344	0.00305344	0.00152672	0.00152672	0.00152672	0.00458015	0.00458015	0.00305344	0.00305344	0.00458015	0.00458015	0
NMBE_567148	0.160305	0.141985	0.145038	0.00610687	0.00458015	0.00458015	0.00458015	0.00305344	0.00305344	0.00305344	0.00305344	0.00152672	0.00152672	0.00152672	0.00458015	0.00458015	0.00305344	0.00305344	0.00458015	0.00458015	0	0
NMBE_567162	0.160305	0.141985	0.145038	0.00610687	0.00458015	0.00458015	0.00458015	0.00305344	0.00305344	0.00305344	0.00305344	0.00152672	0.00152672	0.00152672	0.00458015	0.00458015	0.00305344	0.00305344	0.00458015	0.00458015	0	0	0
NMBE_568103	0	0.149618	0.158779	0.158779	0.160305	0.160305	0.160305	0.158779	0.158779	0.158779	0.158779	0.160305	0.160305	0.160305	0.160305	0.160305	0.158779	0.158779	0.160305	0.160305	0.160305	0.160305	0.160305	0.160305
MNHW_S.15.21_02	0.151145	0.175573	0.172519	0.164885	0.166412	0.166412	0.166412	0.167939	0.167939	0.167939	0.167939	0.169466	0.169466	0.169466	0.166412	0.166412	0.167939	0.167939	0.166412	0.166412	0.169466	0.169466	0.169466	0.169466	0.151145
MNHW_S.15.27_12	0.155725	0.170992	0.184733	0.175573	0.174046	0.174046	0.174046	0.169466	0.169466	0.169466	0.169466	0.170992	0.170992	0.170992	0.174046	0.174046	0.169466	0.169466	0.174046	0.174046	0.170992	0.170992	0.170992	0.170992	0.155725	0.143511
MNHW_S.15.29_02	0.158779	0.157252	0.172519	0.152672	0.154198	0.154198	0.154198	0.152672	0.152672	0.152672	0.152672	0.154198	0.154198	0.154198	0.154198	0.154198	0.152672	0.152672	0.154198	0.154198	0.154198	0.154198	0.154198	0.154198	0.158779	0.0839695	0.149618
MNHW_S.15.29_101	0.158779	0.160305	0.160305	0.177099	0.175573	0.175573	0.175573	0.174046	0.174046	0.174046	0.174046	0.175573	0.175573	0.175573	0.175573	0.175573	0.174046	0.174046	0.175573	0.175573	0.175573	0.175573	0.175573	0.175573	0.158779	0.163359	0.164885	0.170992
MNHW_S-Er_50	0.175573	0.158779	0.161832	0.187786	0.189313	0.189313	0.189313	0.184733	0.184733	0.184733	0.184733	0.18626	0.18626	0.18626	0.189313	0.189313	0.184733	0.184733	0.189313	0.189313	0.184733	0.184733	0.184733	0.184733	0.175573	0.184733	0.178626	0.189313	0.180153
MNHW_S-Er_51	0.175573	0.157252	0.160305	0.18626	0.187786	0.187786	0.187786	0.183206	0.183206	0.183206	0.183206	0.184733	0.184733	0.184733	0.187786	0.187786	0.183206	0.183206	0.187786	0.187786	0.183206	0.183206	0.183206	0.183206	0.175573	0.18626	0.177099	0.187786	0.178626	0.00305344
NMBE_543063	0.168196	0.16208	0.178899	0.171254	0.172783	0.172783	0.172783	0.169725	0.169725	0.169725	0.169725	0.171254	0.171254	0.171254	0.172783	0.172783	0.169725	0.169725	0.172783	0.172783	0.171254	0.171254	0.171254	0.171254	0.168196	0.0932722	0.159021	0.0948012	0.181957	0.183486	0.185015
NMBE_564601	0.171254	0.185015	0.180428	0.17737	0.178899	0.178899	0.178899	0.174312	0.174312	0.174312	0.174312	0.175841	0.175841	0.175841	0.178899	0.178899	0.174312	0.174312	0.178899	0.178899	0.174312	0.174312	0.174312	0.174312	0.171254	0.178899	0.166667	0.165138	0.175841	0.19419	0.192661	0.180428
NMBE_564607	0.16055	0.16055	0.174312	0.157492	0.155963	0.155963	0.155963	0.157492	0.157492	0.157492	0.157492	0.159021	0.159021	0.159021	0.155963	0.155963	0.157492	0.157492	0.155963	0.155963	0.159021	0.159021	0.159021	0.159021	0.16055	0.0840979	0.140673	0.0412844	0.171254	0.188073	0.186544	0.0856269	0.168196
NMBE_564609	0.16208	0.168196	0.180428	0.168196	0.166667	0.166667	0.166667	0.163609	0.163609	0.163609	0.163609	0.165138	0.165138	0.165138	0.166667	0.166667	0.163609	0.163609	0.166667	0.166667	0.165138	0.165138	0.165138	0.165138	0.16208	0.0948012	0.152905	0.0963303	0.169725	0.192661	0.191131	0.0703364	0.174312	0.088685
NMBE_565821	0.155963	0.16055	0.163609	0.180428	0.178899	0.178899	0.178899	0.17737	0.17737	0.17737	0.17737	0.178899	0.178899	0.178899	0.178899	0.178899	0.17737	0.17737	0.178899	0.178899	0.178899	0.178899	0.178899	0.178899	0.155963	0.163609	0.163609	0.169725	0.0030581	0.17737	0.175841	0.181957	0.178899	0.171254	0.169725
NMBE_568094	0.129969	0.148318	0.154434	0.157492	0.155963	0.155963	0.155963	0.154434	0.154434	0.154434	0.154434	0.155963	0.155963	0.155963	0.155963	0.155963	0.154434	0.154434	0.155963	0.155963	0.155963	0.155963	0.155963	0.155963	0.129969	0.165138	0.163609	0.154434	0.157492	0.175841	0.174312	0.172783	0.14526	0.155963	0.159021	0.157492
Noricella_oreinos_M6_782_7237	0.145038	0.143511	0.152672	0.137405	0.138931	0.138931	0.138931	0.135878	0.135878	0.135878	0.135878	0.137405	0.137405	0.137405	0.138931	0.138931	0.135878	0.135878	0.138931	0.138931	0.138931	0.138931	0.138931	0.138931	0.145038	0.148092	0.148092	0.164885	0.174046	0.180153	0.180153	0.143731	0.171254	0.151376	0.151376	0.171254	0.14526
Noricella_oreinos_M7_55_707	0.148092	0.146565	0.157252	0.137405	0.138931	0.138931	0.138931	0.135878	0.135878	0.135878	0.135878	0.137405	0.137405	0.137405	0.138931	0.138931	0.135878	0.135878	0.138931	0.138931	0.138931	0.138931	0.138931	0.138931	0.148092	0.151145	0.152672	0.161832	0.178626	0.177099	0.177099	0.14526	0.174312	0.148318	0.152905	0.175841	0.142202	0.010687
Noricella_oreinos_M8_781_7227	0.148092	0.146565	0.157252	0.137405	0.138931	0.138931	0.138931	0.135878	0.135878	0.135878	0.135878	0.137405	0.137405	0.137405	0.138931	0.138931	0.135878	0.135878	0.138931	0.138931	0.138931	0.138931	0.138931	0.138931	0.148092	0.151145	0.152672	0.161832	0.178626	0.177099	0.177099	0.14526	0.174312	0.148318	0.152905	0.175841	0.142202	0.010687	0
Noricella_oreinos_M9_779_7222	0.149618	0.146565	0.158779	0.138931	0.140458	0.140458	0.140458	0.137405	0.137405	0.137405	0.137405	0.138931	0.138931	0.138931	0.140458	0.140458	0.137405	0.137405	0.140458	0.140458	0.140458	0.140458	0.140458	0.140458	0.149618	0.152672	0.149618	0.166412	0.178626	0.181679	0.181679	0.14526	0.172783	0.152905	0.152905	0.175841	0.146789	0.00763359	0.00610687	0.00610687
Noricella_oreinos_M11_134_999	0.139461	0.134707	0.147385	0.129952	0.131537	0.131537	0.131537	0.128368	0.128368	0.128368	0.128368	0.129952	0.129952	0.129952	0.131537	0.131537	0.128368	0.128368	0.131537	0.131537	0.131537	0.131537	0.131537	0.131537	0.139461	0.1458	0.147385	0.158479	0.161648	0.179081	0.179081	0.144444	0.173016	0.146032	0.149206	0.160317	0.142857	0.0142631	0.0126783	0.0126783	0.0126783
Noricella_oreinos_M14_79_757	0.145038	0.141985	0.154198	0.134351	0.135878	0.135878	0.135878	0.132824	0.132824	0.132824	0.132824	0.134351	0.134351	0.134351	0.135878	0.135878	0.132824	0.132824	0.135878	0.135878	0.135878	0.135878	0.135878	0.135878	0.145038	0.151145	0.148092	0.161832	0.172519	0.178626	0.178626	0.146789	0.174312	0.148318	0.151376	0.169725	0.142202	0.010687	0.00916031	0.00916031	0.00916031	0.00633914
Noricella_scheerpeltzi_M1_12_767	0.152672	0.131298	0.134351	0.161832	0.163359	0.163359	0.163359	0.163359	0.163359	0.163359	0.163359	0.164885	0.164885	0.164885	0.163359	0.163359	0.163359	0.163359	0.163359	0.163359	0.163359	0.163359	0.163359	0.163359	0.152672	0.143511	0.135878	0.146565	0.167939	0.163359	0.163359	0.155963	0.172783	0.149847	0.154434	0.165138	0.139144	0.131298	0.129771	0.129771	0.131298	0.128368	0.129771
Noricella_scheerpeltzi_M3_765_7172	0.152672	0.134351	0.135878	0.164885	0.166412	0.166412	0.166412	0.166412	0.166412	0.166412	0.166412	0.167939	0.167939	0.167939	0.166412	0.166412	0.166412	0.166412	0.166412	0.166412	0.166412	0.166412	0.166412	0.166412	0.152672	0.146565	0.137405	0.145038	0.167939	0.164885	0.164885	0.157492	0.171254	0.148318	0.159021	0.165138	0.140673	0.135878	0.131298	0.131298	0.132824	0.129952	0.131298	0.00458015
Noricella_scheerpeltzi_M4_367_3396	0.152672	0.135878	0.138931	0.164885	0.166412	0.166412	0.166412	0.164885	0.164885	0.164885	0.164885	0.166412	0.166412	0.166412	0.166412	0.166412	0.164885	0.164885	0.166412	0.166412	0.164885	0.164885	0.164885	0.164885	0.152672	0.148092	0.140458	0.149618	0.167939	0.164885	0.164885	0.155963	0.175841	0.152905	0.16055	0.165138	0.139144	0.135878	0.134351	0.134351	0.135878	0.133122	0.134351	0.00916031	0.00763359
Noricella_scheerpeltzi_M5_443_4108	0.151145	0.132824	0.134351	0.163359	0.164885	0.164885	0.164885	0.164885	0.164885	0.164885	0.164885	0.166412	0.166412	0.166412	0.164885	0.164885	0.164885	0.164885	0.164885	0.164885	0.164885	0.164885	0.164885	0.164885	0.151145	0.145038	0.138931	0.146565	0.166412	0.163359	0.163359	0.155963	0.172783	0.149847	0.157492	0.163609	0.139144	0.134351	0.132824	0.132824	0.134351	0.131537	0.132824	0.00305344	0.00152672	0.00610687
Petasina_unidentata_811	0.167939	0.164885	0.183206	0.172519	0.170992	0.170992	0.170992	0.170992	0.170992	0.170992	0.170992	0.172519	0.172519	0.172519	0.170992	0.170992	0.170992	0.170992	0.170992	0.170992	0.172519	0.172519	0.172519	0.172519	0.167939	0.151145	0.166412	0.154198	0.181679	0.192366	0.19084	0.155963	0.195719	0.154434	0.159021	0.181957	0.166667	0.154198	0.155725	0.155725	0.152672	0.152139	0.151145	0.161832	0.164885	0.163359	0.163359
Petasina_unidentata_1821	0.181679	0.149618	0.164885	0.174046	0.175573	0.175573	0.175573	0.172519	0.172519	0.172519	0.172519	0.174046	0.174046	0.174046	0.175573	0.175573	0.172519	0.172519	0.175573	0.175573	0.175573	0.175573	0.175573	0.175573	0.181679	0.189313	0.18626	0.172519	0.198473	0.198473	0.198473	0.181957	0.197248	0.174312	0.191131	0.198777	0.185015	0.157252	0.163359	0.163359	0.163359	0.155309	0.157252	0.174046	0.175573	0.177099	0.174046	0.148092
Plicuteria_lubomirskii_HNHM_98814-2469	0.169466	0.146565	0.143511	0.177099	0.178626	0.178626	0.178626	0.177099	0.177099	0.177099	0.177099	0.178626	0.178626	0.178626	0.178626	0.178626	0.177099	0.177099	0.178626	0.178626	0.177099	0.177099	0.177099	0.177099	0.169466	0.180153	0.184733	0.177099	0.172519	0.180153	0.180153	0.168196	0.191131	0.175841	0.165138	0.172783	0.154434	0.178626	0.177099	0.177099	0.180153	0.177496	0.177099	0.145038	0.145038	0.149618	0.146565	0.177099	0.18626
Plicuteria_lubomirskii_NHMW-2465	0.178626	0.161832	0.160305	0.18626	0.187786	0.187786	0.187786	0.183206	0.183206	0.183206	0.183206	0.184733	0.184733	0.184733	0.187786	0.187786	0.18626	0.18626	0.187786	0.187786	0.183206	0.183206	0.183206	0.183206	0.178626	0.19084	0.183206	0.18626	0.203053	0.184733	0.184733	0.183486	0.201835	0.188073	0.186544	0.203364	0.168196	0.178626	0.177099	0.177099	0.180153	0.177496	0.174046	0.170992	0.169466	0.172519	0.170992	0.193893	0.189313
[truncated: 2 more columns]

## Sheet: Caption
Table. Estimates of Evolutionary Divergence between Sequences
The number of base differences per site from between sequences are shown. This analysis involved 51 nucleotide sequences. Codon positions included were 1st+2nd+3rd+Noncoding. All ambiguous positions were removed for each sequence pair (pairwise deletion option). There were a total of 655 positions in the final dataset. Evolutionary analyses were conducted in MEGA X [1]
1. Kumar S., Stecher G., Li M., Knyaz C., and Tamura K. (2018). MEGA X: Molecular Evolutionary Genetics Analysis across computing platforms. Molecular Biology and Evolution 35:1547-1549.
Disclaimer: Although utmost care has been taken to ensure the correctness of the caption, the caption text is provided "as is" without any warranty of any kind. Authors advise the user to carefully check the caption prior to its use for any purpose and report any errors or problems to the authors immediately (www.megasoftware.net). In no event shall the authors and their employers be liable for a…
